# Supplementary material for: Body fatness, diabetes, physical activity and risk of kidney stones: a systematic review and meta-analysis of cohort studies
Source: Springer Nature journal article supplement (doi:10.1007/s10654-018-0426-4), 2018-07-31

Supplementary text. PubMed search terms

("physical activity" OR physical activity[MeSH] OR exercise OR exercise[MeSH] OR sports OR sports[MeSH] OR walking OR walking[MeSH] OR biking OR bicycling OR bicycling[MeSH] OR running OR running[MeSH] OR fitness OR "exercise test" OR exercise test[MeSH] OR inactivity OR sedentary OR diabetes OR diabetes[MeSH] OR glucose OR glucose[MeSH] OR "medical history" OR medical history[MeSH] OR "body mass index" OR body mass index[MeSH] OR BMI OR overweight OR overweight[MeSH] OR obesity OR obesity[MeSH] OR anthropometry OR anthropometry[MeSH] OR fatness OR "body fatness" OR "abdominal fatness" OR "abdominal obesity" OR abdominal obesity[MeSH] OR "waist circumference" OR "hip circumference" OR "waist-to-hip ratio" OR waist-to-hip ratio[MeSH] OR adiposity OR adiposity[MeSH] OR "weight gain" OR weight gain[MeSH] OR "weight change" OR weight change[MeSH] OR "weight loss" OR weight loss[MeSH])

AND

("kidney stones" OR kidney stones[MeSH] OR "nephrolithiasis" OR nephrolithiasis[MeSH])

AND

("case-control" OR cohort OR prospective OR longitudinal OR retrospective OR "follow-up" OR "cross-sectional" OR "hazard ratio" OR "hazard ratios" OR "relative risk" OR "relative risks" OR "incidence rate ratio" OR "incidence rate ratios" OR "odds ratio" OR odds ratios OR incidence)

Embase search terms

((body mass index or BMI or overweight or obesity or anthropometry or fatness or body fatness or abdominal fatness or abdominal obesity or waist circumference or hip circumference or waist-to-hip ratio or adiposity or weight gain or weight change or weight loss).ab,ti or body mass index/ or BMI/ or overweight/ or obesity/ or anthropometry/ or fatness/ or body fatness/ or abdominal fatness/ or abdominal obesity/ or waist circumference/ or hip circumference/ or waist-to-hip ratio/ or adiposity/ or weight gain/ or weight change/ or weight loss/ or (diabetes or glucose or medical history).ab,ti or diabetes/ or glucose/ or medical history/ or (physical activity or exercise or sports or walking or biking or bicycling or running or fitness or exercise test or inactivity or sedentary).ab,ti or physical activity/ or exercise/ or sports/ or walking/ or biking/ or bicycling/ or running/ or fitness/ or exercise test/ or inactivity/ or sedentary/)

and

((kidney stones or nephrolithiasis).ab,ti. or kidney stones/ or nephrolithiasis/)

and

(case-control or cohort or prospective or longitudinal or retrospective or follow-up or cross-sectional or hazard ratio or hazard ratios or relative risk or relative risks or incidence rate ratio or incidence rate ratios or odds ratio or odds ratios or incidence).ab,ti.

Supplementary Table 1. List of excluded studies and reason for exclusion

| Exclusion reason                | Reference number |
|---------------------------------|------------------|
| <3 categories of exposure (BMI) | (1-4)            |
| Abstract only publication       | (5)              |
| Bariatric surgery study         | (6)              |
| Case-control study              | (7-23)           |
| Case only study                 | (24-29)          |
| Comment                         | (30-32)          |
| Cross-sectional study           | (33-61)          |
| Duplicates                      | (62-65)          |
| No risk estimates               | (66-68)          |
| Not relevant data               | (69-73)          |
| Not relevant exposure           | (74-117)         |
| Not relevant outcome            | (118-120)        |
| Patient populations             | (121)            |
| Pediatric population            | (122)            |
| Review                          | (123-166)        |

#### Reference List

1. Chang IH, Lee YT, Lee DM et al. Metabolic syndrome, urine pH, and time-dependent risk of nephrolithiasis in Korean men without hypertension and diabetes. *Urology* 2011;78:753-8.
2. Jung HS, Chang IH, Kim KD et al. Possible Relationship between Metabolic Syndrome Traits and Nephrolithiasis: Incidence for 15 Years According to Gender. *Korean J Urol* 2011;52:548-53.
3. Turney BW, Appleby PN, Reynard JM, Noble JG, Key TJ, Allen NE. Diet and risk of kidney stones in the Oxford cohort of the European Prospective Investigation into Cancer and Nutrition (EPIC). *Eur J Epidemiol* 2014;29:363-9.
4. Nguyen S, Baggerly L, French C, Heaney RP, Gorham ED, Garland CF. 25-Hydroxyvitamin D in the range of 20 to 100 ng/mL and incidence of kidney stones. *American journal of public health* 104 (9) (pp 1783-1787), 2014;Sep.
5. Cho YS, Joo KJ, Park HJ, Kwon CH. Relationship between nephrolithiasis and components of metabolic syndrome in Korean adults. *European Urology, Supplements Conference: 25th Anniversary Congress of the European Association of Urology, EAU Barcelona Spain Conference Publication: (var pagings) 9 (2) (pp 168), 2010;April.*
6. Lieske JC, Mehta RA, Milliner DS, Rule AD, Bergstralh EJ, Sarr MG. Kidney stones are common after bariatric surgery. *Kidney International* 87 (4) (pp 839-845), 2015;08.
7. Hamano S, Nakatsu H, Suzuki N, Tomioka S, Tanaka M, Murakami S. Kidney stone disease and risk factors for coronary heart disease. *Int J Urol* 2005;12:859-63.
8. Lieske JC, de I, V, Gettman MT et al. Diabetes mellitus and the risk of urinary tract stones: a population-based case-control study. *Am J Kidney Dis* 2006;48:897-904.
9. Daudon M, Traxer O, Conort P, Lacour B, Jungers P. Type 2 diabetes increases the risk for uric acid stones. *J Am Soc Nephrol* 2006;17:2026-33.
10. Milicevic S, Bijelic R, Krivokuca V, Bojic M, Popovic-Pejicic S, Bojanic N. Correlation of the body mass index and calcium nephrolithiasis in adult population. *Med Arch* 2013;67:423-7.
11. Wang J, Luo GT, Niu WJ et al. [Risk factors for the kidney stones: a hospital-based case-control study in a district hospital in Beijing]. *Beijing Da Xue Xue Bao* 2013;45:971-4.

12. Nerli R, Jali M, Guntaka AK, Patne P, Patil S, Hiremath MB. Type 2 diabetes mellitus and renal stones. *Adv Biomed Res* 2015;4:180.
13. Akarken I, Tarhan H, Ekin RG et al. Visceral obesity: A new risk factor for stone disease. *Can Urol Assoc J* 2015;9:E795-E799.
14. Zhao A, Dai M, Chen YJ, Chang HE, Liu AP, Wang PY. Risk factors associated with nephrolithiasis: a case-control study in China. *Asia Pac J Public Health* 2015;27:NP414-NP424.
15. Wu CC, Hung SH, Lin HC, Lee CZ, Lee HC, Chung SD. Sialolithiasis is associated with nephrolithiasis: a case-control study. *Acta Otolaryngol* 2016;136:497-500.
16. Xiao X, Dong Z, Ye X et al. Association between OPN genetic variations and nephrolithiasis risk. *Biomed Rep* 2016;5:321-6.
17. Peng J, Zhou HB, Cheng JQ, Dong SF, Shi LY, Zhang D. [Study on the epidemiology and risk factors of renal calculi in special economic zone of Shenzhen city]. *Zhonghua Liu Xing Bing Xue Za Zhi* 2003;24:1112-4.
18. Verde I, Rusu E, Suliman E, Costache A, Armean P. Diabetes in the hospitalized patients with urological diseases. *J Med Life* 2015;8:496-501.
19. Hall WD, Pettinger M, Oberman A et al. Risk factors for kidney stones in older women in the southern United States. *Am J Med Sci* 2001;322:12-8.
20. Arzoz M, Ibarz L, Roca J et al. Relationship between metabolic syndrome and kidney stone: Differences between first time and recurrent stone formers. *European Urology, Supplements Conference: 26th Annual Congress of the European Association of Urology, EAU Vienna Austria Conference Publication: (var pagings) 10 (2) (pp 228), 2011;March.*
21. Dai M, Zhao A, Liu A, You L, Wang P. Dietary Factors and Risk of Kidney Stone: A Case-Control Study in Southern China. *Journal of Renal Nutrition* 23 (2) (pp e21-e28), 2013;March.
22. Sancak EB, Resorlu M, Akbas A, Gulpinar MT, Arslan M, Resorlu B. Do hypertension, diabetes mellitus and obesity increase the risk of severity of nephrolithiasis? *Pakistan Journal of Medical Sciences* 31 (3) (pp 566-571), 2015;2015.
23. Ticinesi A, Nouvenne A, Ferraro PM et al. Idiopathic Calcium Nephrolithiasis and Hypovitaminosis D: A Case-control Study. *Urology* 87 (pp 40-45), 2016;01.
24. Mosli HA, Mosli HH. Increased body mass index is associated with larger renal calculi. *Urology* 2012;80:974-7.
25. Inci M, Demirtas A, Sarli B, Akinsal E, Baydilli N. Association between body mass index, lipid profiles, and types of urinary stones. *Ren Fail* 2012;34:1140-3.
26. Kadlec AO, Greco K, Fridirici ZC, Hart ST, Vellos T, Turk TM. Metabolic syndrome and urinary stone composition: what factors matter most? *Urology* 2012;80:805-10.
27. Torricelli FC, De S, Gebreselassie S, Li I, Sarkissian C, Monga M. Type-2 diabetes and kidney stones: impact of diabetes medications and glycemic control. *Urology* 2014;84:544-8.
28. Torricelli FC, De SK, Gebreselassie S, Li I, Sarkissian C, Monga M. Dyslipidemia and kidney stone risk. *J Urol* 2014;191:667-72.
29. Trinchieri A, Croppi E, Montanari E. Obesity and urolithiasis: evidence of regional influences. *Urolithiasis* 2017;45:271-8.

30. Yi JJ, Yi LJ, Xiang GZ, Qing WW, Yong LJ, Jiang LJ. Re: The association of increasing body mass index and kidney stone disease. M. J. Semins, A. D. Shore, M. A. Makary, T. Magnuson, R. Johns and B. R. Matlaga. *J Urol* 2010; 183: 571-575. *J Urol* 2011;185:1984.
31. Iguchi T, Nakatani T. Editorial comment to percutaneous nephrolithotomy increases the risk of diabetes: a 5-year follow-up study. *Int J Urol* 2014;21:669.
32. Lieske JC. New insights regarding the interrelationship of obesity, diet, physical activity, and kidney stones. *J Am Soc Nephrol* 2014;25:211-2.
33. Soucie JM, Coates RJ, McClellan W, Austin H, Thun M. Relation between geographic variability in kidney stones prevalence and risk factors for stones. *Am J Epidemiol* 1996;143:487-95.
34. Ramey SL, Franke WD, Shelley MC. Relationship among risk factors for nephrolithiasis, cardiovascular disease, and ethnicity: focus on a law enforcement cohort. *AAOHN J* 2004;52:116-21.
35. West B, Luke A, Durazo-Arvizu RA, Cao G, Shoham D, Kramer H. Metabolic syndrome and self-reported history of kidney stones: the National Health and Nutrition Examination Survey (NHANES III) 1988-1994. *Am J Kidney Dis* 2008;51:741-7.
36. West B, Luke A, Durazo-Arvizu RA, Cao G, Shoham D, Kramer H. Metabolic Syndrome and Self-Reported History of Kidney Stones: The National Health and Nutrition Examination Survey (NHANES III) 1988-1994. *American Journal of Kidney Diseases* 51 (5) (pp 741-747), 2008;May.
37. Rendina D, Mossetti G, De FG et al. Association between metabolic syndrome and nephrolithiasis in an inpatient population in southern Italy: role of gender, hypertension and abdominal obesity. *Nephrol Dial Transplant* 2009;24:900-6.
38. Semins MJ, Shore AD, Makary MA, Magnuson T, Johns R, Matlaga BR. The association of increasing body mass index and kidney stone disease. *J Urol* 2010;183:571-5.
39. Kohjimoto Y, Sasaki Y, Iguchi M, Inagaki T, Hara I. Metabolic syndrome increases the risk for kidney stones: RESULTS from a Nationwide Survey on urolithiasis in Japan. *Journal of Urology Conference: 2010;April*.
40. Nowfar S, Palazzi-Churas K, Chang DC, Sur RL. The relationship of obesity and gender prevalence changes in United States inpatient nephrolithiasis. *Urology* 2011;78:1029-33.
41. Jeong IG, Kang T, Bang JK et al. Association between metabolic syndrome and the presence of kidney stones in a screened population. *Am J Kidney Dis* 2011;58:383-8.
42. Ando R, Suzuki S, Nagaya T et al. Impact of insulin resistance, insulin and adiponectin on kidney stones in the Japanese population. *Int J Urol* 2011;18:131-8.
43. Kabeya Y, Kato K, Tomita M et al. Associations of insulin resistance and glycemic control with the risk of kidney stones. *Intern Med* 2012;51:699-705.
44. Kim YJ, Kim CH, Sung EJ, Kim SR, Shin HC, Jung WJ. Association of nephrolithiasis with metabolic syndrome and its components. *Metabolism* 2013;62:808-13.
45. Ando R, Nagaya T, Suzuki S et al. Kidney stone formation is positively associated with conventional risk factors for coronary heart disease in Japanese men. *J Urol* 2013;189:1340-6.
46. Weinberg AE, Patel CJ, Chertow GM, Leppert JT. Diabetic severity and risk of kidney stone disease. *Eur Urol* 2014;65:242-7.
47. Patil SM, Nerli RB, Jali MV, Guntaka AK, Patne PB, Hiremath MB. Type 2 diabetes mellitus and renal stones. *Indian Journal of Urology Conference: 47th Annual Conference of Urological Society of India, USICON 2014;January*.

48. Daels FP, Gaizauskas A, Rioja J et al. Age-related prevalence of diabetes mellitus, cardiovascular disease and anticoagulation therapy use in a urolithiasis population and their effect on outcomes: the Clinical Research Office of the Endourological Society Ureteroscopy Global Study. *World J Urol* 2015;33:859-64.
49. Cano-Castineira R, Carrasco-Valiente J, Perula-de-Torres LA et al. Prevalence of renal stones in Andalusian population: results of PreLiRenA study. *Actas Urol Esp* 2015;39:26-31.
50. Mello MF, Marchini GS, Camara C et al. A large 15 - year database analysis on the influence of age, gender, race, obesity and income on hospitalization rates due to stone disease. *Int Braz J Urol* 2016;42:1150-9.
51. Moudi E, Hosseini SR, Bijani A. Nephrolithiasis in elderly population; effect of demographic characteristics. *J Nephropathol* 2017;6:63-8.
52. Zeng G, Mai Z, Xia S et al. Prevalence of kidney stones in China: an ultrasonography based cross-sectional study. *BJU Int* 2017;120:109-16.
53. Liu Y-T, Yang P-Y, Yang Y-W, Sun H-Y, Lin I-C. The association of nephrolithiasis with metabolic syndrome and its components: A cross-sectional analysis. *Therapeutics and Clinical Risk Management* 13 (pp 41-48), 2017;2017.
54. Arias VR, Perula de Torres LA, Jimenez GC et al. *Medicina Clinica* (no pagination), 2017;December.
55. Sancak EB, Resorlu M, Akbas A, Gulpinar MT, Arslan M, Resorlu B. Do Hypertension, diabetes mellitus and obesity increase the risk of severity of nephrolithiasis? *Pak J Med Sci* 2015;31:566-71.
56. Hassan EM, Malekpour Z, Pourrezaei F, Ghaem H. Prevalence of obesity and abdominal obesity in patients with kidney stone disease. *Journal of Gastroenterology and Hepatology Conference: Asian Pacific Digestive Week* 2012;December.
57. Scales C, Smith A, Hanley J, Saigal C. Obesity, socioeconomic status, and the risk of kidney stones in the united states. *Journal of Urology Conference*: 2012;April.
58. Kohjimoto Y, Sasaki Y, Iguchi M, Matsumura N, Inagaki T, Hara I. Association of metabolic syndrome traits and severity of kidney stones: Results from a nationwide survey on urolithiasis in Japan. *American Journal of Kidney Diseases* 61 (6) (pp 923-929), 2013;June.
59. Gordiano EA, Tondin LM, Miranda RC, Baptista DR, Carvalho M. Evaluation of food intake and excretion of metabolites in nephrolithiasis. *Jornal brasileiro de nefrologia : 'orgao oficial de Sociedades Brasileira e Latino-Americana de Nefrologia* 36 (4) (pp 437-445), 2014;01.
60. Pigna F, Sakhaee K, ms-Huet B, Maalouf NM. Body fat content and distribution and urinary risk factors for nephrolithiasis. *Clinical Journal of the American Society of Nephrology* 9 (1) (pp 159-165), 2014;07.
61. Weinberg A, Patel C, Chertow G, Leppert J. Diabetic severity and risk of kidney stone disease. *Journal of Urology Conference*: 2013;April.
62. Curhan GC, Willett WC, Rimm EB, Speizer FE, Stampfer MJ. Body size and risk of kidney stones. *J Am Soc Nephrol* 1998;9:1645-52.
63. Semins MJ, Shore AD, Steele K, Makary MA, Matlaga BR. The effect of increasing body mass index on kidney stone disease. *Journal of Urology Conference*: 2009;var.
64. Sorensen MD, Kahn AJ, Reiner AP et al. Impact of nutritional factors on incident kidney stone formation: a report from the WHI OS. *J Urol* 2012;187:1645-9.
65. Ferraro PM, Taylor EN, Gambaro G, Curhan GC. Dietary and Lifestyle Risk Factors Associated with Incident Kidney Stones in Men and Women. *J Urol* 2017.

66. Cappuccio FP, Siani A, Barba G et al. A prospective study of hypertension and the incidence of kidney stones in men. *Journal of Hypertension* 17 (7) (pp 1017-1022), 1999;1999.
67. Sarica K, Eryildirim B, Yencilek F, Kuyumcuoglu U. Role of Overweight Status on Stone-forming Risk Factors in Children: A Prospective Study. *Urology* 73 (5) (pp 1003-1007), 2009;May.
68. Rezaee ME, Ward CE, Pollock M, Shetty SD. Association between multiple chronic conditions and urolithiasis. *Int Urol Nephrol* 2017.
69. Indridason OS, Birgisson S, Edvardsson VO, Sigvaldason H, Sigfusson N, Palsson R. Epidemiology of kidney stones in Iceland: a population-based study. *Scand J Urol Nephrol* 2006;40:215-20.
70. Sarica K, Altay B, Erturhan S. Effect of Being Overweight on Stone-Forming Risk Factors. *Urology* 71 (5) (pp 771-774), 2008;May.
71. Weikert C, Weikert S, Schulze MB et al. Presence of gallstones or kidney stones and risk of type 2 diabetes. *Am J Epidemiol* 2010;171:447-54.
72. Tiwari R, Campfield T, Wittcopp C et al. Metabolic syndrome in obese adolescents is associated with risk for nephrolithiasis. *J Pediatr* 2012;160:615-20.
73. Shavit L, Ferraro PM, Johri N et al. Effect of being overweight on urinary metabolic risk factors for kidney stone formation. *Nephrology Dialysis Transplantation* 30 (4) (pp 607-613), 2015;01.
74. Ando R, Suzuki S, Nagaya T et al. Impact of insulin resistance, serum insulin and adiponectin levels on kidney stones in Japanese population. *Journal of Urology Conference: 2010*;April.
75. Assimos DG. Re: Ascorbic acid supplements and kidney stone incidence among men: A prospective study. *Journal of Urology* 190;October.
76. Taylor EN, Curhan GC. Dietary calcium from dairy and nondairy sources, and risk of symptomatic kidney stones. *Journal of Urology* 190;October.
77. Shoag J, Eisner BH. Relationship between C-reactive protein and kidney stone prevalence. *Journal of Urology* 191;2014.
78. Baber RJ. Postmenopausal hormone use and the risk of nephrolithiasis. *Climacteric* 14 (1) (pp 191;February).
79. Ferraro PM, Taylor EN, Gambaro G, Curhan GC. Vitamin D Intake and the Risk of Incident Kidney Stones. *Journal of Urology* 197;01.
80. Taylor EN, Curhan GC. Fructose consumption and the risk of kidney stones. *Kidney International* 73 (2) (pp 207;10).
81. La VC, Decarli A, Pagano R. Vegetable consumption and risk of chronic disease. *Epidemiology* 9 (2) (pp 208;March).
82. Holoch PA, Tracy CR. Antioxidants and self-reported history of kidney stones: The national health and nutrition examination survey. *Journal of Endourology* 25 (12) (pp 1903;01).
83. Van MT, Tielemans C, Wissing KM, Vonckx L. Risk factors for kidney stones and the impact of preventive measures. A retrospective cohort study of patients attending an outpatient kidney stone clinic. *Acta Clinica Belgica: International Journal of Clinical and Laboratory Medicine Conference: 1920*;2015.
84. Taylor EN, Fung TT, Curhan GC. DASH-style diet associates with reduced risk for kidney stones. *Journal of the American Society of Nephrology* 1920;October.

85. Power C, Barker DJP, Nelson M, Winter PD. Diet and renal stones: A case-control study. *British Journal of Urology* 56 (5) (pp 456-459), 1984;1984.
86. Kramer HM, Curhan G. The association between gout and nephrolithiasis: The National Health and Nutrition Examination Survey III, 1988-1994. *American Journal of Kidney Diseases* 40 (1) (pp 37-42), 2002;2002.
87. Kramer HJ, Choi HK, Atkinson K, Stampfer M, Curhan GC. The association between gout and nephrolithiasis in men: The Health Professionals' Follow-Up Study. *Kidney International* 64 (3) (pp 1022-1026), 2003;01.
88. Taylor EN, Stampfer MJ, Curhan GC. Dietary factors and the risk of incident kidney stones in men: New insights after 14 years of follow-up. *Journal of the American Society of Nephrology* 15 (12) (pp 3225-3232), 2004;December.
89. Taylor EN, Curhan GC. Oxalate intake and the risk for nephrolithiasis. *Journal of the American Society of Nephrology* 18 (7) (pp 2198-2204), 2007;July.
90. Eisner BH, Eisenberg ML, Stoller ML. Impact of Urine Sodium on Urine Risk Factors for Calcium Oxalate Nephrolithiasis. *Journal of Urology* 182 (5) (pp 2330-2333), 2009;November.
91. Semins MJ, Matlaga BR, Shore AD et al. The Effect of Gastric Banding on Kidney Stone Disease. *Urology* 74 (4) (pp 746-749), 2009;October.
92. Matlaga BR, Shore AD, Magnuson T, Clark JM, Johns R, Makary MA. Effect of Gastric Bypass Surgery on Kidney Stone Disease. *Journal of Urology* 181 (6) (pp 2573-2577), 2009;June.
93. Robusto F, Colucci G, Iacovazzo P et al. Food quality and co-morbidity in the kidney stones: Observational case-control study. *Archivio Italiano di Urologia e Andrologia Conference: 6th Eurolithiasis (eULIS) Society Symposium 14th European Symposium on Urolithiasis Como Italy Conference Publication: (var pagings)* 81 (3) (pp 128), 2009;September.
94. Rentschler A, Oehlschlager S, Wirth MP. Nutritional, environmental and family history determinants of recurrent nephrolithiasis versus primary nephrolithiasis. *European Urology, Supplements Conference: 25th Anniversary Congress of the European Association of Urology, EAU Barcelona Spain Conference Publication: (var pagings)* 9 (2) (pp 168), 2010;April.
95. Assimos D, Knight J, Holmes R. Impact of dietary fructose on kidney stone risk. *Journal of Urology Conference: 2010;April*.
96. Holmes RP, Knight J, Mufarrij P, Assimos DG. Impact of dietary fructose on stone risk parameters. *Journal of Endourology Conference: 28th World Congress of Endourology and SWL Chicago, IL United States Conference Publication: (var pagings)* 24 (pp A6), 2010;September.
97. Sorensen MD, Eisner BH, Stone KL et al. Fractional calcium absorption is associated with nephrolithiasis in older women in the Study of Osteoporotic Fractures (SOF). *Journal of the American College of Surgeons Conference: 97th Annual Clinical Congress of the American College of Surgeons San Francisco, CA United States Conference Publication: (var pagings)* 213 (3 SUPPL 1) (pp S145), 2011;September.
98. Tang J, McFann KK, Chonchol MB. Association between serum 25-hydroxyvitamin D and nephrolithiasis: The National Health and Nutrition Examination Survey III, 1988-94. *Nephrology Dialysis Transplantation* 27 (12) (pp 4385-4389), 2012;December.
99. Scheffler P, Dunn M, Christou NV, Andersen RE, Andonian S. Increasing doses of vitamin d supplementation are associated with decreased risk of nephrolithiasis in post gastric bypass surgery. *Journal of Urology Conference: 2012;April*.
100. Ferraro PM, Taylor EN, Gambaro G, Curhan GC. Soda and other beverages and the risk of kidney stones. *Clinical Journal of the American Society of Nephrology* 8 (8) (pp 1389-1395), 2013;July.

101. Tan M, Xia S, Zhang Q, Zhu J, Bao E. The -160C>a polymorphism in E-cadherin is associated with the risk of nephrolithiasis. *PloS one* 8 (9) (pp e73109), 2013;2013.
102. Masterson JH, Woo JR, Chang DC, L'Esperance JO, Stoller ML, Sur RL. Hyperlipidemia is associated with an increased risk of nephrolithiasis LCDR. *Journal of Endourology Conference: 31st World Congress of Endourology and SWL, WCE 2013;October.*
103. Sorensen M, Hsi R, Chi T et al. Dietary intake of fiber, vegetables, and fruit decrease the risk of incident kidney stones in women: A women's health initiative (WHI) report. *Journal of Urology Conference: 2013;April.*
104. Masterson LCDR, Woo JR, Chang DC, L'Esperance CDRJ, Stoller ML, Sur RL. Do statin medications reduce the incidence of nephrolithiasis in patients with hyperlipidemia? *Journal of Urology Conference: 2013;April.*
105. Li C-H, Sung F-C, Wang Y-C, Lin D, Kao C-H. Gallstones increase the risk of developing renal stones: A nationwide population-based retrospective cohort study. *QJM* 107 (6) (pp 451-457), 2014;hcu017.
106. Ferraro PM, Taylor EN, Gambaro G, Curhan GC. Caffeine intake and the risk of kidney stones. *American Journal of Clinical Nutrition* 100 (6) (pp 1596-1603), 2014;01.
107. Oddsson A, Sulem P, Helgason H et al. Common and rare variants associated with kidney stones and biochemical traits. *Nature Communications* 6 (no pagination), 2015;7975.
108. Loftus CJ, Byrne MD, Sivalingam S. Increased rate of kidney stone formation with calcium supplementation after bariatric surgery. *Endocrine Reviews Conference: 97th Annual Meeting and Expo of the Endocrine Society, ENDO 2015;2015.*
109. Taylor EN, Hoofnagle AN, Curhan GC. Calcium and phosphorus regulatory hormones and risk of incident symptomatic kidney stones. *Clinical Journal of the American Society of Nephrology* 10 (4) (pp 667-675), 2015;2015.
110. Park S, Fahey N, Lapin B, Pruitt J, Wang C. Vitamin D deficiency treated with weekly 50,000 IU vitamin D supplementation increases renal stone risk. *Journal of Urology Conference: 2015;April.*
111. Ferraro PM, Curhan GC, Gambaro G, Taylor EN. Total, dietary, and supplemental Vitamin C intake and risk of incident kidney stones. *American Journal of Kidney Diseases* 67 (3) (pp 400-407), 2016;01.
112. Hara A, Yang W-Y, Petit T et al. Incidence of nephrolithiasis in relation to environmental exposure to lead and cadmium in a population study. *Environmental Research* 145 (pp 1-8), 2016;February.
113. Ma G, Yuan Q, Wang Q et al. Association between MIF-AS rs755622 and nephrolithiasis risk in a Chinese population. *Medical Science Monitor* 22 (pp 563-568), 2016;20.
114. Cohen A, Adamsky M, Nottingham C, Pruitt J, Lapin B, Park S. Statin intake reduces kidney stone formation. *Journal of Urology Conference: 2016;April.*
115. Tsai S-H, Stoller M, Sherer B, Chao Z-H, Tong T-H. Sleep apnea: An independent risk factor for nephrolithiasis. *Journal of Urology Conference: 112th Annual Meeting of the American Urological Association, AUA 2017;April.*
116. Tasian G, Jemelietta T, Goldfarb D et al. Association between oral antibiotics and incident kidney stones. *Journal of Urology Conference: 112th Annual Meeting of the American Urological Association, AUA 2017;April.*
117. Ferraro PM, Mandel EI, Curhan GC, Gambaro G, Taylor EN. Dietary protein and potassium, diet-dependent net acid load, and risk of incident kidney stones. *Clinical Journal of the American Society of Nephrology* 11 (10) (pp 1834-1844), 2016;07.



118. Saldana TM, Basso O, Darden R, Sandler DP. Carbonated beverages and chronic kidney disease. *Epidemiology* 18 (4) (pp 501-506), 2007;July.
119. Saucier NA, Sinha MK, Liang KV et al. Risk Factors for CKD in Persons With Kidney Stones: A Case-Control Study in Olmsted County, Minnesota. *American Journal of Kidney Diseases* 55 (1) (pp 61-68), 2010;January.
120. Purnomo AD, Rochadi S, Indrawarman. The influence of body mass index (BMI) for stone free rate, complication, and length of stay patient post percutaneous nephrolithotomy (PCNL). *BJU International Conference: 37th Annual Scientific Meeting of the Indonesian Urological Association Lombok Indonesia Conference Publication: (var pagings) 114 (pp 12), 2014;October.*
121. Zhou T, Watts K, Agalliu I, DiVito J, Hoenig DM. Effects of visceral fat area and other metabolic parameters on stone composition in patients undergoing percutaneous nephrolithotomy. *J Urol* 2013;190:1416-20.
122. Ayoob R, Wang W, Schwaderer A. Body fat composition and occurrence of kidney stones in hypercalciuric children. *Pediatr Nephrol* 2011;26:2173-8.
123. Vescini F, Buffa A, Caudarella R. The influence of calcium on renal stone disease. [Italian]. *Progress in Nutrition* 9 (1) (pp 1920;2007.
124. Saxena AK. Emerging global epidemic of obesity: the renal perspective. *Ann Saudi Med* 2006;26:288-95.
125. Rutkowski P, Klassen A, Sebekova K, Bahner U, Heidland A. Renal disease in obesity: the need for greater attention. *J Ren Nutr* 2006;16:216-23.
126. Daudon M, Jungers P. Diabetes and nephrolithiasis. *Curr Diab Rep* 2007;7:443-8.
127. Ferrari P, Piazza R, Ghidini N, Bisi M, Galizia G, Ferrari G. Lithiasis and risk factors. *Urol Int* 2007;79 Suppl 1:8-15.
128. Eknoyan G. Obesity, diabetes, and chronic kidney disease. *Current Diabetes Reports* 7 (6) (pp 449-453), 2007;December.
129. Mossetti G, Rendina D, De FG et al. Metabolic syndrome and nephrolithiasis: can we hypotize a common background? *Clin Cases Miner Bone Metab* 2008;5:114-7.
130. Trinchieri A. Epidemiology of urolithiasis: an update. *Clin Cases Miner Bone Metab* 2008;5:101-6.
131. Obligado SH, Goldfarb DS. The association of nephrolithiasis with hypertension and obesity: a review. *Am J Hypertens* 2008;21:257-64.
132. Frassetto L, Kohlstadt I. Treatment and prevention of kidney stones: an update. *Am Fam Physician* 2011;84:1234-42.
133. Ahmed MH, Ahmed HT, Khalil AA. Renal stone disease and obesity: what is important for urologists and nephrologists? *Ren Fail* 2012;34:1348-54.
134. Morandi A, Maffei C. Urogenital complications of obesity. *Best Pract Res Clin Endocrinol Metab* 2013;27:209-18.
135. Alicic RZ, Patakoti R, Tuttle KR. Direct and indirect effects of obesity on the kidney. *Adv Chronic Kidney Dis* 2013;20:121-7.
136. Ramaswamy K, Shah O. Metabolic syndrome and nephrolithiasis. *Transl Androl Urol* 2014;3:285-95.
137. Naguib MT. Kidney disease in the obese patient. *South Med J* 2014;107:481-5.

138. Domingos F, Serra A. Metabolic syndrome: a multifaceted risk factor for kidney stones. *Scand J Urol* 2014;48:414-9.
139. Roudakova K, Monga M. The evolving epidemiology of stone disease. *Indian J Urol* 2014;30:44-8.
140. Sakhaee K. Epidemiology and clinical pathophysiology of uric acid kidney stones. *J Nephrol* 2014;27:241-5.
141. DiBianco JM, Jarrett TW, Mufarrij P. Metabolic Syndrome and Nephrolithiasis Risk: Should the Medical Management of Nephrolithiasis Include the Treatment of Metabolic Syndrome? *Rev Urol* 2015;17:117-28.
142. Manoj Kumar KR. Weight gain and the risk of kidney stones. *Journal of Pharmaceutical Sciences and Research* 7 (9) (pp 776-778), 2015;01.
143. Prochaska ML, Taylor EN, Curhan GC. Insights Into Nephrolithiasis From the Nurses' Health Studies. *Am J Public Health* 2016;106:1638-43.
144. Ozgor F, Ucpinar B, Binbay M. Effect of Obesity on Prone Percutaneous Nephrolithotomy Outcomes: A Systemic Review. *Urol J* 2016;13:2471-8.
145. Wong Y, Cook P, Roderick P, Somani BK. Metabolic Syndrome and Kidney Stone Disease: A Systematic Review of Literature. *J Endourol* 2016;30:246-53.
146. Kovesdy CP, Furth L, Zoccali C. Obesity and kidney disease: hidden consequences of the epidemic. *Clin Kidney J* 2017;10:1-8.
147. Kovesdy CP, Furth S, Zoccali C. Obesity and kidney disease: hidden consequences of the epidemic. *Rev Med Chil* 2017;145:281-91.
148. Kovesdy CP, Furth SL, Zoccali C. Obesity and Kidney Disease: Hidden Consequences of the Epidemic. *Can J Kidney Health Dis* 2017;4:2054358117698669.
149. Kovesdy CP, Furth SL, Zoccali C. Obesity and kidney disease: hidden consequences of the epidemic. *Braz J Med Biol Res* 2017;50:e6075.
150. Kovesdy CP, Furth S, Zoccali C, World Kidney Day Steering Committee. Obesity and kidney disease: Hidden consequences of the epidemic. *Physiol Int* 2017;104:1-14.
151. Kovesdy CP, Furth SL, Zoccali C. Obesity and kidney disease: hidden consequences of the epidemic. *J Bras Nefrol* 2017;39:1-10.
152. Kovesdy CP, Furth S, Zoccali C. Obesity and kidney disease: Hidden consequences of the epidemic. *Saudi J Kidney Dis Transpl* 2017;28:241-52.
153. Kovesdy CP, Furth S, Zoccali C. Obesity and kidney disease: Hidden consequences of the epidemic. *Arch Esp Urol* 2017;70:311-21.
154. Kovesdy CP, Furth S, Zoccali C, World Kidney Day Steering Committee /. Obesity and Kidney Disease: Hidden Consequences of the Epidemic. *Iran J Kidney Dis* 2017;11:99-108.
155. Kovesdy CP, Furth SL, Zoccali C. Obesity and Kidney Disease: Hidden Consequences of the Epidemic. *Blood Purif* 2017;43:346-54.
156. Kovesdy CP, Furth SL, Zoccali C. Obesity and Kidney Disease: Hidden Consequences of the Epidemic. *J Ren Nutr* 2017;27:75-7.
157. Kovesdy CP, Furth SL, Zoccali C. Obesity and kidney disease: hidden consequences of the epidemic. *J Nephrol* 2017;30:1-10.

158. Kovesdy CP, Furth SL, Zoccali C. Obesity and kidney disease: Hidden consequences of the epidemic. *J Ren Care* 2017;43:3-10.
159. Kovesdy CP, Furth SL, Zoccali C. Obesity and Kidney Disease: Hidden Consequences of the Epidemic. *Am J Nephrol* 2017;45:283-91.
160. Kovesdy CP, Furth SL, Zoccali C. Obesity and Kidney Disease: Hidden Consequences of the Epidemic. *Nephron* 2017;135:243-51.
161. Kovesdy CP, Furth S, Zoccali C. Obesity and kidney disease: Hidden consequences of the epidemic. *Nephrol Ther* 2017;13:131-7.
162. Kovesdy CP, Furth SL, Zoccali C. Obesity and kidney disease: hidden consequences of the epidemic. *Kidney Int* 2017;91:260-2.
163. Kovesdy CP, Furth S, Zoccali C et al. Obesity and kidney disease: Hidden consequences of the epidemic. [Spanish]. *Revista de Nefrologia, Dialisis y Trasplante* 37 (1) (pp 1-12), 2017;2017.
164. Kovesdy CP, Furth SL, Zoccali C. Obesity and Kidney Disease: Hidden Consequences of the Epidemic. *Kidney Dis (Basel)* 2017;3:33-41.
165. Hyams E, Dulabon L, Shah O. Obesity and the treatment of nephrolithiasis: A systematic review of the literature and meta-analysis. *Journal of Endourology Conference: 27th WCE 2009;October*.
166. Rendina D, De FG, D'Elia L, Strazzullo P. Metabolic syndrome and nephrolithiasis: A systematic review and meta-analysis of the scientific evidence. *Journal of Nephrology* 27 (4) (pp 371-376), 2014;August.

Supplementary Table 2. Prospective studies of adiposity and kidney stones

| First author, publication year, country | Study name or description            | Study period                  | Number of participants, number of cases                                                                       | Measurement of anthropometry | Exposure                                                                                            | Comparison                                                                                                                                                                                                     | Relative risk (95% confidence interval)                                                                                                                                                                                                                                                                                                                                          | Adjustment for confounders                                                                                                                                                                              |
|-----------------------------------------|--------------------------------------|-------------------------------|---------------------------------------------------------------------------------------------------------------|------------------------------|-----------------------------------------------------------------------------------------------------|----------------------------------------------------------------------------------------------------------------------------------------------------------------------------------------------------------------|----------------------------------------------------------------------------------------------------------------------------------------------------------------------------------------------------------------------------------------------------------------------------------------------------------------------------------------------------------------------------------|---------------------------------------------------------------------------------------------------------------------------------------------------------------------------------------------------------|
| Taylor EN et al, 2005, USA              | Health Professionals Follow-up Study | 1986-2002, 16 years follow-up | 45988 men, age 40-75 years:<br>1609 cases<br>1483 cases (weight change)<br>1214 cases (waist circumference)   | Self-reported (validated)    | Weight<br><br>Weight change between age 21 years and baseline<br><br>BMI<br><br>Waist circumference | 64.5 kg<br>72.7<br>80.9<br>90.9<br>106.8<br>-5.9 kg<br>0<br>+5.0 kg<br>+11.4 kg<br>+15.9 kg<br><21.0<br>21.0-22.9<br>23.0-24.9<br>25.0-27.4<br>27.5-29.9<br>≥30.0<br>86.4 cm<br>90.2<br>96.5<br>104.1<br>114.3 | 1.00<br>1.15 (0.93-1.43)<br>1.34 (1.09-1.66)<br>1.33 (1.07-1.65)<br>1.44 (1.11-1.86)<br>1.05 (0.81-1.36)<br>1.00<br>1.24 (1.03-1.49)<br>1.27 (1.04-1.53)<br>1.39 (1.14-1.70)<br>0.73 (0.52-1.03)<br>1.00<br>0.94 (0.79-1.12)<br>1.20 (1.02-1.41)<br>1.24 (1.03-1.50)<br>1.33 (1.08-1.63)<br>1.00<br>1.23 (1.00-1.51)<br>1.37 (1.11-1.69)<br>1.42 (1.13-1.78)<br>1.48 (1.13-1.93) | Age, use of thiazide diuretics, alcohol, calcium supplement use, fluids, animal protein, calcium, magnesium, potassium, sodium, vitamin C<br>Weight change: also adjusted for weight in early adulthood |
| Taylor EN et al, 2005, USA              | Nurses' Health Study 1               | 1980-2000, 20 years follow-up | 93758 women, age 34-59 years:<br>1687 cases<br>1580 cases (weight change)<br>1108 cases (waist circumference) | Self-reported (validated)    | Weight<br><br>Weight change between age 18 years and baseline<br><br>BMI                            | 60.0 kg<br>71.8<br>80.5<br>90.9<br>109.1<br>-6.4 kg<br>0<br>+5.5<br>+11.8<br>+22.7<br><21.0                                                                                                                    | 1.00<br>1.29 (1.14-1.46)<br>1.37 (1.18-1.59)<br>1.61 (1.37-1.89)<br>1.89 (1.52-2.36)<br>0.93 (0.71-1.23)<br>1.00<br>1.00 (0.82-1.22)<br>1.23 (1.01-1.50)<br>1.70 (1.46-2.05)<br>1.15 (0.95-1.38)                                                                                                                                                                                 | Age, use of thiazide diuretics, alcohol, calcium supplement use, fluids, animal protein, calcium, magnesium, potassium, sodium, vitamin C<br>Weight change: also adjusted for weight in early adulthood |

|                            |                                           |                                        |                                                                                                                            |                           |                                                                                                     |                                                                                                                                                                                                      |                                                                                                                                                                                                                                                                                                                                                                                  |                                                                                                                                                                                                         |
|----------------------------|-------------------------------------------|----------------------------------------|----------------------------------------------------------------------------------------------------------------------------|---------------------------|-----------------------------------------------------------------------------------------------------|------------------------------------------------------------------------------------------------------------------------------------------------------------------------------------------------------|----------------------------------------------------------------------------------------------------------------------------------------------------------------------------------------------------------------------------------------------------------------------------------------------------------------------------------------------------------------------------------|---------------------------------------------------------------------------------------------------------------------------------------------------------------------------------------------------------|
|                            |                                           |                                        |                                                                                                                            |                           | Waist circumference                                                                                 | 21.0-22.9<br>23.0-24.9<br>25.0-27.4<br>27.5-29.9<br>≥30.0<br>72.4 cm<br>81.3<br>88.9<br>96.5<br>109.2                                                                                                | 1.00<br>1.26 (1.07-1.50)<br>1.34 (1.13-1.59)<br>1.75 (1.45-2.10)<br>1.90 (1.61-2.25)<br>1.00<br>1.24 (1.05-1.47)<br>1.44 (1.21-1.72)<br>1.49 (1.23-1.80)<br>1.71 (1.40-2.10)                                                                                                                                                                                                     |                                                                                                                                                                                                         |
| Taylor EN et al, 2005, USA | Nurses' Health Study 2                    | 1991-2001, 10 years follow-up          | 101877 women, age 27-44 years: 1531 cases (weight change) 1512 cases (waist circumference) 751 cases (waist circumference) | Self-reported (validated) | Weight<br><br>Weight change between age 18 years and baseline<br><br>BMI<br><br>Waist circumference | 59.1 kg<br>70.9<br>80.5<br>90.9<br>111.4<br>-5.5 kg<br>0<br>+4.5<br>+11.4<br>+22.7<br><21.0<br>21.0-22.9<br>23.0-24.9<br>25.0-27.4<br>27.5-29.9<br>≥30.0<br>71.1 cm<br>81.3<br>88.9<br>96.5<br>111.8 | 1.00<br>1.26 (1.10-1.45)<br>1.49 (1.27-1.75)<br>1.73 (1.47-2.04)<br>1.92 (1.59-2.31)<br>1.13 (0.86-1.50)<br>1.00<br>1.03 (0.84-1.26)<br>1.27 (1.03-1.55)<br>1.82 (1.50-2.21)<br>1.13 (0.94-1.36)<br>1.00<br>1.24 (1.04-1.50)<br>1.47 (1.22-1.77)<br>1.68 (1.36-2.07)<br>2.09 (1.77-2.48)<br>1.00<br>0.98 (0.80-1.21)<br>1.21 (0.96-1.54)<br>1.71 (1.34-2.17)<br>1.94 (1.49-2.52) | Age, use of thiazide diuretics, alcohol, calcium supplement use, fluids, animal protein, calcium, magnesium, potassium, sodium, vitamin C<br>Weight change: also adjusted for weight in early adulthood |
| Akoudad S, 2010, USA       | Atherosclerosis Risk in Communities Study | 1993-1995 - 2005, 10.8 years follow-up | 12161 men and women, age 45-64 years: 971 cases                                                                            | Measured                  | Waist circumference                                                                                 | Per 14.4 cm                                                                                                                                                                                          | 1.11 (0.88-1.40)                                                                                                                                                                                                                                                                                                                                                                 | Age, sex, race, region, diabetes, triglycerides, hypertension, uric acid, gallstones                                                                                                                    |
| Oda E et al, 2014, Japan   | Medical Check-up Center,                  | 2008-2009 - 2013, 3.2                  | 1726 men and 992 women,                                                                                                    | Measured                  | BMI, men<br>BMI, women                                                                              | Per 1 unit<br>Per 1 unit                                                                                                                                                                             | 1.042 (0.987-1.101)<br>0.949 (0.866-1.040)                                                                                                                                                                                                                                                                                                                                       | Age, antihypertensive drug use, antidiabetic or antihyperlipidemic                                                                                                                                      |

|                                |                                           |                                           |                                          |          |                                                        |                                                                                                                |                                                                                                                                                                              |                                                                                                                                                                                                                                                                                                                                                              |
|--------------------------------|-------------------------------------------|-------------------------------------------|------------------------------------------|----------|--------------------------------------------------------|----------------------------------------------------------------------------------------------------------------|------------------------------------------------------------------------------------------------------------------------------------------------------------------------------|--------------------------------------------------------------------------------------------------------------------------------------------------------------------------------------------------------------------------------------------------------------------------------------------------------------------------------------------------------------|
|                                | Nagaoka                                   | years follow-up                           | mean age 51.9 years: 238 cases           |          | Waist circumference, men<br>Waist circumference, women | Per 1 cm<br>Per 1 cm                                                                                           | 1.015 (0.996-1.035)<br>0.988 (0.958-1.019)                                                                                                                                   | drug use, smoking, alcohol, physical activity, history of coronary heart disease and stroke, hs-CRP, SBP, fasting glucose, TG, HDL cholesterol, LDL cholesterol, uric acid, sodium, potassium, chloride, calcium                                                                                                                                             |
| Sorensen MD et al, 2014, USA   | Women's Health Initiative                 | 1993-1998 - NA, 8 years follow-up         | 84225 women, age 50-79 years: 2392 cases | Measured | BMI<br><br>BMI                                         | <18.5<br>18.5-24.9<br>25.0-29.9<br>30.0-34.9<br>≥35.0<br><18.5<br>18.5-24.9<br>25.0-29.9<br>30.0-34.9<br>≥35.0 | 0.79 (0.47-1.32)<br>1.00<br>1.30 (1.17-1.44)<br>1.62 (1.43-1.83)<br>1.81 (1.57-2.10)<br>0.79 (0.47-1.34)<br>1.00<br>1.21 (1.07-1.37)<br>1.36 (1.13-1.63)<br>1.31 (1.02-1.68) | Age, race, diabetes, calcium supplement use, HRT, income, region, water, sodium, animal protein, dietary calcium + physical activity, energy intake                                                                                                                                                                                                          |
| Yoshimura E et al, 2016, Japan | Natural Gas Company in metropolitan Tokyo | 1985-2004/2005, 19 years follow-up        | 4074 men, age 20-40 years: 258 cases     | Measured | BMI                                                    | 15.9-21.6<br>21.7-23.7<br>23.8-35.6                                                                            | 1.00<br>1.28 (0.93-1.76)<br>1.41 (1.02-1.97)                                                                                                                                 | Age, alcohol, SBP, cardiorespiratory fitness, cigarette smoking                                                                                                                                                                                                                                                                                              |
| Shu X et al, 2017, China       | Shanghai Women's Health Study             | 1996-2000 - 2004-2008, 10 years follow-up | 69166 women, age 40-70 years: 1451 cases | Measured | BMI                                                    | <18.5<br>18.5-24.9<br>25.0-29.9<br>≥30.0                                                                       | 1.01 (0.75-1.37)<br>1.00<br>1.14 (1.01-1.28)<br>1.17 (0.92-1.49)                                                                                                             | Birth year, pack-years of smoking, education, income, energy intake, dietary protein intake, dietary calcium intake, calcium supplement use, vitamin C intake, vitamin C supplement use, dietary potassium intake, dietary magnesium intake, physical activity, history of coronary heart disease/stroke, type 2 diabetes, hypertension, cholelithiasis, WHR |
| Shu X et al, 2017, China       | Shanghai Men's Health Study               | 2002-2006 - 2004-2008, 5 years            | 58054 men, age 40-74 years: 1202 cases   | Measured | BMI                                                    | <18.5<br>18.5-24.9<br>25.0-29.9<br>≥30.0                                                                       | 0.82 (0.58-1.16)<br>1.00<br>1.15 (1.01-1.31)<br>1.30 (0.94-1.80)                                                                                                             | Birth year, pack-years of smoking, education, income, energy intake, dietary protein intake, dietary calcium intake,                                                                                                                                                                                                                                         |

|  |  |           |  |  |  |  |  |                                                                                                                                                                                                                                         |
|--|--|-----------|--|--|--|--|--|-----------------------------------------------------------------------------------------------------------------------------------------------------------------------------------------------------------------------------------------|
|  |  | follow-up |  |  |  |  |  | calcium supplement use, vitamin C intake, vitamin C supplement use, dietary potassium intake, dietary magnesium intake, physical activity, history of coronary heart disease/stroke, type 2 diabetes, hypertension, cholelithiasis, WHR |
|--|--|-----------|--|--|--|--|--|-----------------------------------------------------------------------------------------------------------------------------------------------------------------------------------------------------------------------------------------|

BMI=body mass index, HRT=hormone replacement therapy, hs-CRP=high sensitivity C-reactive protein, LDL=low-density lipoprotein, SBP=systolic blood pressure, TG=triglycerides, WHR=waist-to-hip ratio

Supplementary Table 3. Prospective studies of diabetes mellitus and kidney stones

| First author, publication year, country | Study name or description                 | Study period                           | Number of participants, number of cases           | Exposure          | Comparison | Relative risk (95% confidence interval) | Adjustment for confounders                                                                                                                                                                                                |
|-----------------------------------------|-------------------------------------------|----------------------------------------|---------------------------------------------------|-------------------|------------|-----------------------------------------|---------------------------------------------------------------------------------------------------------------------------------------------------------------------------------------------------------------------------|
| Taylor EN et al, 2005, USA              | Health Professionals Follow-up Study      | 1980-2000, 20 years follow-up          | 45988 men, age 40-75 years: 1609 cases            | Diabetes mellitus | Yes vs. no | 1.29 (1.05-1.58)                        | Age, use of thiazide diuretics, alcohol, calcium supplement use, fluids, animal protein, calcium, magnesium, potassium, sodium, vitamin C                                                                                 |
| Taylor EN et al, 2005, USA              | Nurses' Health Study 1                    | 1991-2001, 10 years follow-up          | 93758 women, age 34-59 years: 1687 cases          | Diabetes mellitus | Yes vs. no | 1.60 (1.16-2.21)                        | Age, use of thiazide diuretics, alcohol, calcium supplement use, fluids, animal protein, calcium, magnesium, potassium, sodium, vitamin C                                                                                 |
| Taylor EN et al, 2005, USA              | Nurses' Health Study 2                    | 1986-2000, 14 years follow-up          | 101877 women, age 27-44 years: 1531 cases         | Diabetes mellitus | Yes vs. no | 0.81 (0.59-1.09)                        | Age, use of thiazide diuretics, alcohol, calcium supplement use, fluids, animal protein, calcium, magnesium, potassium, sodium, vitamin C                                                                                 |
| Akoudad S, 2010, USA                    | Atherosclerosis Risk in Communities Study | 1993-1995 - 2005, 10.8 years follow-up | 12161 men and women, age 45-64 years: 971 cases   | Diabetes mellitus | Yes vs. no | 1.98 (1.20-3.28)                        | Age, sex, race, region, waist circumference, triglycerides, hypertension, uric acid, gallstones                                                                                                                           |
| Jakobsen AK et al, 2014, Sweden         | Swedish Nationwide Cohort study           | 1997-2001 - 2009, 5.7 years follow-up  | 48211 men and women, mean age 46 years: 716 cases | Diabetes mellitus | Yes vs. no | 1.08 (0.53-2.19)                        | Age, anti-TNF, uveitis, renal insufficiency, hypertension, inflammatory bowel disease, ischemic heart disease, psoriasis, nephrolithiasis, calcium metabolic disorders, arthritis urica/cystinuria/hyperoxaluria, obesity |
| Masterson JH et al, 2015, USA           | Naval Medical Center, San Diego           | 2000-NA, 3.45 years follow-up          | 52184 men and women, mean age 31 years: 702 cases | Diabetes mellitus | Yes vs. no | 1.10 (0.90-1.40)                        | Age, sex, peripheral vascular disease, hypertension, coronary artery disease, obesity, tobacco, dyslipidemia                                                                                                              |
| Shih MT et al, 2016, Taiwan             | Taiwan National Health Insurance          | 2000-2008, 6.78 years                  | 16670 men and women, age 22-79 years: 803 cases   | Diabetes mellitus | Yes vs. no | 1.04 (0.82-1.31)                        | Age, sex, ankylosing spondylitis, urbanization level, hypertension, hyperlipidemia, coronary heart                                                                                                                        |



|                                 |                                                  |                                           |                                                 |                                                        |                          |                                      |                                                                                                                                                                                                                                                                                                                                                  |
|---------------------------------|--------------------------------------------------|-------------------------------------------|-------------------------------------------------|--------------------------------------------------------|--------------------------|--------------------------------------|--------------------------------------------------------------------------------------------------------------------------------------------------------------------------------------------------------------------------------------------------------------------------------------------------------------------------------------------------|
|                                 | Research Database                                | follow-up                                 |                                                 |                                                        |                          |                                      | disease, chronic kidney disease                                                                                                                                                                                                                                                                                                                  |
| Landgren AJ et al, 2017, Sweden | Western Sweden VEGA regional healthcare database | 2006-2012, 3.9 years follow-up            | 168646 men and women, age >19 years: 2803 cases | Diabetes, gout patients<br>Diabetes, non-gout controls | Yes vs. no<br>Yes vs. no | 1.55 (1.18-2.04)<br>1.11 (0.91-1.34) | Age, sex, hypertension, ischemic heart disease, kidney disease, obesity, calcium antagonists, thiazide diuretics, potassium-sparing medications, RAAS-inhibitors, losartan, loop diuretics, statins                                                                                                                                              |
| Shu X et al, 2017, China        | Shanghai Women's Health Study                    | 1996-2000 - 2004-2008, 10 years follow-up | 69166 women, age 40-70 years: 1451 cases        | Type 2 diabetes                                        | Yes vs. no               | 1.11 (0.85-1.44)                     | Birth year, pack-years of smoking, education, income, energy intake, dietary protein intake, dietary calcium intake, calcium supplement use, vitamin C intake, vitamin C supplement use, dietary potassium intake, dietary magnesium intake, physical activity, history of coronary heart disease/stroke, hypertension, cholelithiasis, BMI, WHR |
| Shu X et al, 2017, China        | Shanghai Men's Health Study                      | 2002-2006 - 2004-2008, 5 years follow-up  | 58054 men, age 40-74 years: 1202 cases          | Type 2 diabetes                                        | Yes vs. no               | 0.98 (0.77-1.26)                     | Birth year, pack-years of smoking, education, income, energy intake, dietary protein intake, dietary calcium intake, calcium supplement use, vitamin C intake, vitamin C supplement use, dietary potassium intake, dietary magnesium intake, physical activity, history of coronary heart disease/stroke, hypertension, cholelithiasis, BMI, WHR |

BMI=body mass index, RAAS=renin-angiotensin-aldosterone-system, TNF=tumor necrosis factor, WHR=waist-to-hip ratio

Supplementary Table 4. Prospective studies of physical activity and kidney stones

| First author, publication year, country | Study name or description            | Study period                      | Number of participants, number of cases  | Exposure          | Comparison                                                                | Relative risk (95% confidence interval)                                                                  | Adjustment for confounders                                                                                                                                                                                                                                                  |
|-----------------------------------------|--------------------------------------|-----------------------------------|------------------------------------------|-------------------|---------------------------------------------------------------------------|----------------------------------------------------------------------------------------------------------|-----------------------------------------------------------------------------------------------------------------------------------------------------------------------------------------------------------------------------------------------------------------------------|
| Sorensen MD et al, 2014, USA            | Women's Health Initiative            | 1993-1998 - NA, 8 years follow-up | 84225 women, age 50-79 years: 2392 cases | Physical activity | Inactive<br>0.1-4.9 METs/wk<br>5.0-9.9<br>10.0-19.9<br>20.0-29.9<br>≥30.0 | 1.00<br>0.84 (0.74-0.97)<br>0.78 (0.68-0.90)<br>0.69 (0.60-0.79)<br>0.70 (0.59-0.83)<br>0.69 (0.58-0.83) | Age, race, diabetes, calcium supplement use, HRT, income, region, water, sodium, animal protein, dietary calcium, energy intake                                                                                                                                             |
| Ferraro PM et al, 2015, USA             | Health Professionals Follow-up Study | 1986-2006, 20 years follow-up     | 44964 men, age 40-75 years: 1841 cases   | Physical activity | <5 METs/wk<br>5-9.9<br>10-19.9<br>20-29.9<br>≥30.0                        | 1.00<br>0.96 (0.81-1.15)<br>1.03 (0.88-1.19)<br>0.97 (0.82-1.15)<br>1.00 (0.87-1.14)                     | Age, race, BMI, diabetes, calcium supplement use, geographic region, total energy, calcium, sodium, animal protein, fluids, caffeine, potassium, magnesium, vitamin C, fructose, oxalate, phytate, alcohol, high blood pressure, gout, profession, thiazide                 |
| Ferraro PM et al, 2015, USA             | Nurses' Health Study 1               | 1986-2006, 20 years follow-up     | 74551 women, age 30-55 years: 1439 cases | Physical activity | <5 METs/wk<br>5-9.9<br>10-19.9<br>20-29.9<br>≥30.0                        | 1.00<br>0.99 (0.85-1.15)<br>0.95 (0.82-1.10)<br>0.89 (0.74-1.08)<br>1.01 (0.85-1.19)                     | Age, race, BMI, diabetes, calcium supplement use, postmenopausal hormone use, geographic region, total energy, calcium, sodium, animal protein, fluids, caffeine, potassium, magnesium, vitamin C, fructose, oxalate, phytate, alcohol, high blood pressure, gout, thiazide |
| Ferraro PM et al, 2015, USA             | Nurses' Health Study 2               | 1991-2007, 16 years follow-up     | 95618 women, age 25-42 years: 2075 cases | Physical activity | <5 METs/wk<br>5-9.9<br>10-19.9<br>20-29.9<br>≥30.0                        | 1.00<br>1.01 (0.89-1.15)<br>0.97 (0.86-1.10)<br>0.98 (0.84-1.14)<br>1.03 (0.90-1.18)                     | Age, race, BMI, diabetes, calcium supplement use, postmenopausal hormone use, geographic region, total energy, calcium, sodium, animal protein, fluids, caffeine, potassium, magnesium, vitamin C, fructose, oxalate, phytate, alcohol, high blood pressure, gout, thiazide |

BMI=body mass index, HRT=hormone replacement therapy, MET=metabolic equivalent tasks, wk=week

Supplementary Table 5. Table of RRs and 95% CIs from nonlinear dose-response analysis of BMI and kidney stones

|                           | Kidney stones    |
|---------------------------|------------------|
| BMI                       | RR (95% CI)      |
| 17.5                      | 0.95 (0.85-1.07) |
| 20.0                      | 1.00             |
| 22.5                      | 1.08 (0.99-1.19) |
| 25.0                      | 1.21 (1.03-1.42) |
| 27.5                      | 1.37 (1.09-1.71) |
| 30.0                      | 1.57 (1.18-2.08) |
| 32.5                      | 1.82 (1.28-2.59) |
| 35.0                      | 2.14 (1.40-3.28) |
| 37.5                      | 2.53 (1.52-4.21) |
| 40.0                      | 3.02 (1.66-5.50) |
| p <sub>nonlinearity</sub> | 0.10             |
| p <sub>overall</sub>      | 0.009            |

Supplementary Table 6. Table of RRs and 95% CIs from nonlinear dose-response analysis of waist circumference and kidney stones

|                           | Kidney stones    |
|---------------------------|------------------|
| Waist circumference       | RR (95% CI)      |
| 72.5                      | 1.00             |
| 75.0                      | 1.06 (1.04-1.09) |
| 80.0                      | 1.19 (1.11-1.27) |
| 85.0                      | 1.31 (1.18-1.45) |
| 90.0                      | 1.43 (1.26-1.62) |
| 95.0                      | 1.54 (1.34-1.77) |
| 100.0                     | 1.63 (1.41-1.89) |
| 105.0                     | 1.69 (1.46-1.96) |
| 110.0                     | 1.72 (1.47-2.00) |
| 115.0                     | 1.71 (1.43-2.03) |
| 120.0                     | 1.65 (1.31-2.07) |
| p <sub>nonlinearity</sub> | 0.03             |
| p <sub>overall</sub>      | <0.0001          |

Supplementary Table 7. Table of RRs and 95% CIs from nonlinear dose-response analysis of weight and kidney stones

|                           | Kidney stones    |
|---------------------------|------------------|
| Weight                    | RR (95% CI)      |
| 60                        | 1.00             |
| 65                        | 1.13 (1.09-1.18) |
| 70                        | 1.25 (1.18-1.33) |
| 75                        | 1.35 (1.26-1.45) |
| 80                        | 1.44 (1.34-1.55) |
| 85                        | 1.52 (1.41-1.64) |
| 90                        | 1.59 (1.48-1.71) |
| 95                        | 1.65 (1.53-1.78) |
| 100                       | 1.70 (1.58-1.84) |
| 105                       | 1.75 (1.61-1.91) |
| 110                       | 1.79 (1.63-1.97) |
| p <sub>nonlinearity</sub> | <0.0001          |
| p <sub>overall</sub>      | <0.0001          |

Supplementary Table 8. Table of RRs and 95% CIs from nonlinear dose-response analysis of weight gain and kidney stones

|                           | Kidney stones    |
|---------------------------|------------------|
| Weight gain               | RR (95% CI)      |
| +1 kg                     | 1.00             |
| +5                        | 1.07 (0.98-1.18) |
| +10                       | 1.16 (0.99-1.35) |
| +15                       | 1.27 (1.05-1.55) |
| +20                       | 1.47 (1.17-1.85) |
| +22.5                     | 1.62 (1.28-2.07) |
| p <sub>nonlinearity</sub> | 0.12             |
| p <sub>overall</sub>      | <0.0001          |

Supplementary Table 9. Table of RRs and 95% CIs from nonlinear dose-response analysis of physical activity and kidney stones

|                           | Kidney stones    |
|---------------------------|------------------|
| Physical activity         | RR (95% CI)      |
| 0                         | 1.00             |
| 5                         | 0.80 (0.71-0.89) |
| 10                        | 0.77 (0.65-0.93) |
| 15                        | 0.77 (0.60-0.99) |
| 20                        | 0.77 (0.55-1.07) |
| 25                        | 0.77 (0.51-1.16) |
| 30                        | 0.77 (0.47-1.26) |
| 35                        | 0.77 (0.43-1.38) |
| $p_{\text{nonlinearity}}$ | <0.0001          |
| $p_{\text{overall}}$      | <0.0001          |

Supplementary Figure 1. Influence analysis of BMI and kidney stones

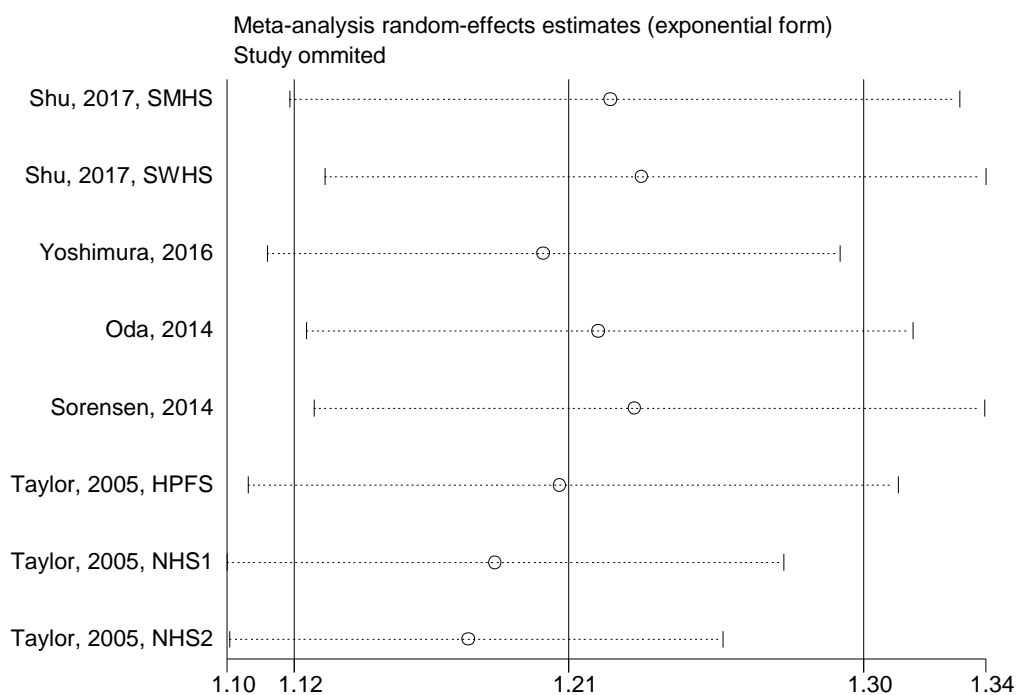

| Study omitted      | e <sup>coef.</sup> | [95% Conf. Interval]       |
|--------------------|--------------------|----------------------------|
| Shu, 2017, SMHS    | 1.2184144          | 1.1181823 1.3276312        |
| Shu, 2017, SWHS    | 1.2281264          | 1.1291627 1.3357637        |
| Yoshimura, 2016    | 1.1973314          | 1.1112378 1.2900952        |
| Oda, 2014          | 1.214574           | 1.1235081 1.3130212        |
| Sorensen, 2014     | 1.226064           | 1.1257808 1.3352802        |
| Taylor, 2005, HPFS | 1.2024806          | 1.1051182 1.3084207        |
| Taylor, 2005, NHS1 | 1.1824367          | 1.0986153 1.2726533        |
| Taylor, 2005, NHS2 | 1.1740136          | 1.0995106 1.253565         |
| <b>Combined</b>    | <b>1.2053105</b>   | <b>1.1195665 1.2976214</b> |



Supplementary Figure 2. Funnel plot of BMI and kidney stones

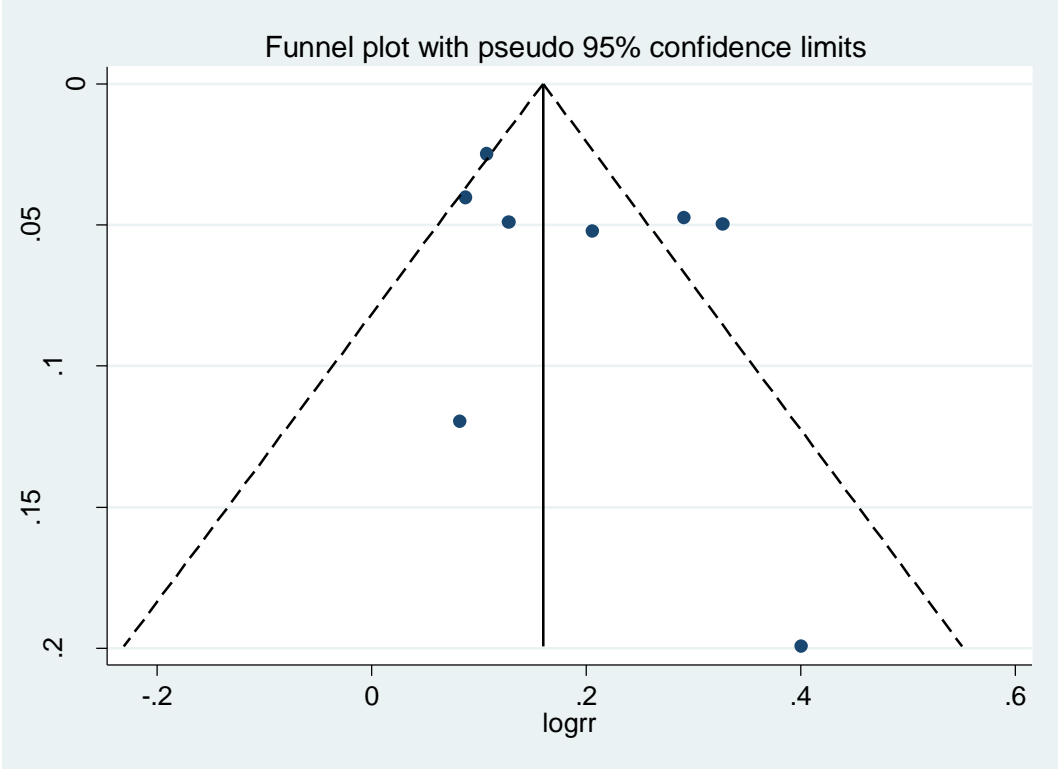

Supplementary Figure 3. Influence analysis of waist circumference and kidney stones

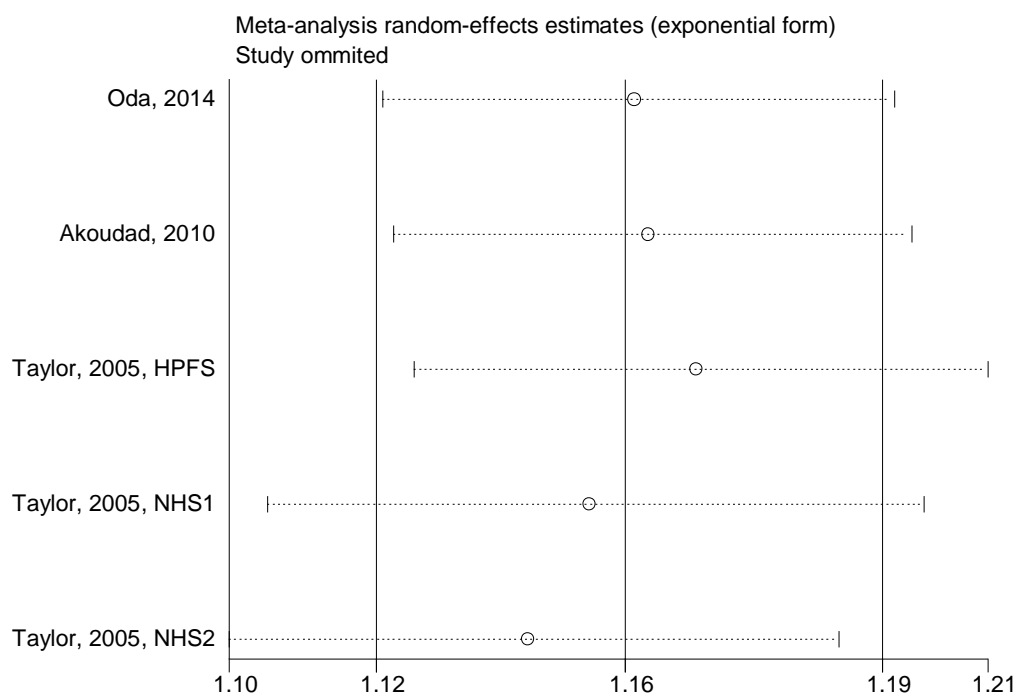

| Study omitted      | e <sup>coef.</sup> | [95% Conf. Interval] |
|--------------------|--------------------|----------------------|
| Oda, 2014          | 1.1563793          | 1.1198394 1.1941117  |
| Akoudad, 2010      | 1.1584125          | 1.1214253 1.1966197  |
| Taylor, 2005, HPFS | 1.1653341          | 1.1244533 1.2077012  |
| Taylor, 2005, NHS1 | 1.1498092          | 1.1031824 1.1984068  |
| Taylor, 2005, NHS2 | 1.1409655          | 1.0975747 1.1860715  |
| Combined           | 1.1550535          | 1.1188871 1.1923889  |

Supplementary Figure 4. Influence analysis of diabetes mellitus and kidney stones

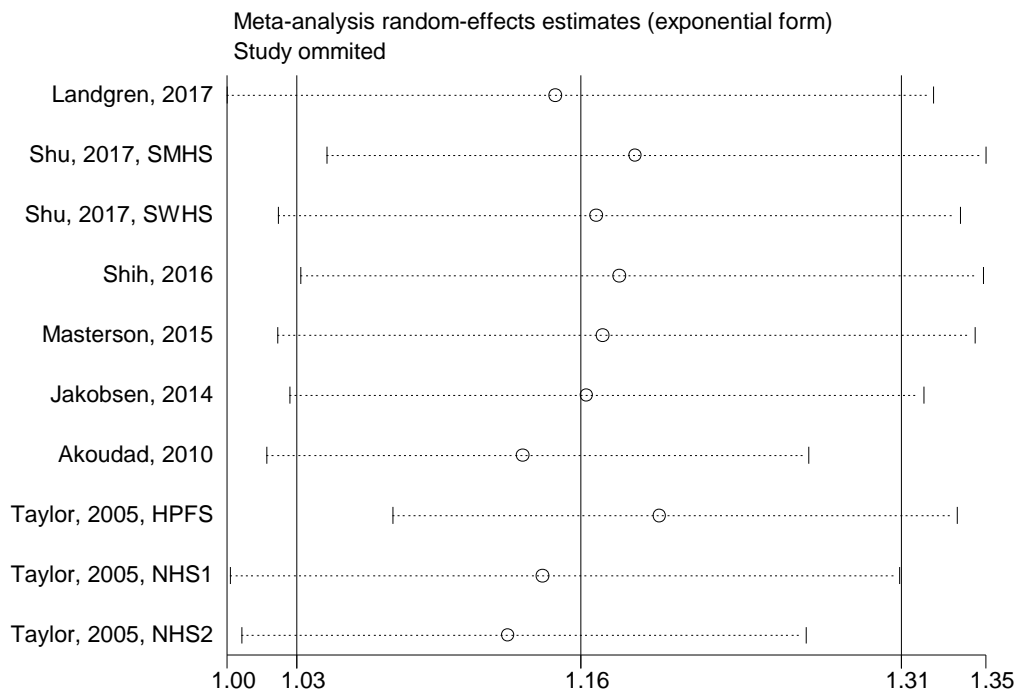

| Study omitted      | e^coef.          | [95% Conf. Interval]      |
|--------------------|------------------|---------------------------|
| Landgren, 2017     | 1.1466128        | 0.99516231 1.3211118      |
| Shu, 2017, SMHS    | 1.1835815        | 1.0411488 1.3454993       |
| Shu, 2017, SWHS    | 1.1656044        | 1.0186979 1.3336962       |
| Shih, 2016         | 1.1762314        | 1.0292715 1.3441743       |
| Masterson, 2015    | 1.1684055        | 1.0185137 1.3403566       |
| Jakobsen, 2014     | 1.161244         | 1.0240749 1.3167864       |
| Akoudad, 2010      | 1.1316855        | 1.013512 1.2636379        |
| Taylor, 2005, HPFS | 1.1947714        | 1.0716271 1.3320665       |
| Taylor, 2005, NHS1 | 1.1407135        | 0.99673223 1.3054934      |
| Taylor, 2005, NHS2 | 1.1247209        | 1.0019338 1.2625555       |
| <b>Combined</b>    | <b>1.1584247</b> | <b>1.0272435 1.306358</b> |

Supplementary Figure 5. Funnel plot of diabetes mellitus and kidney stones

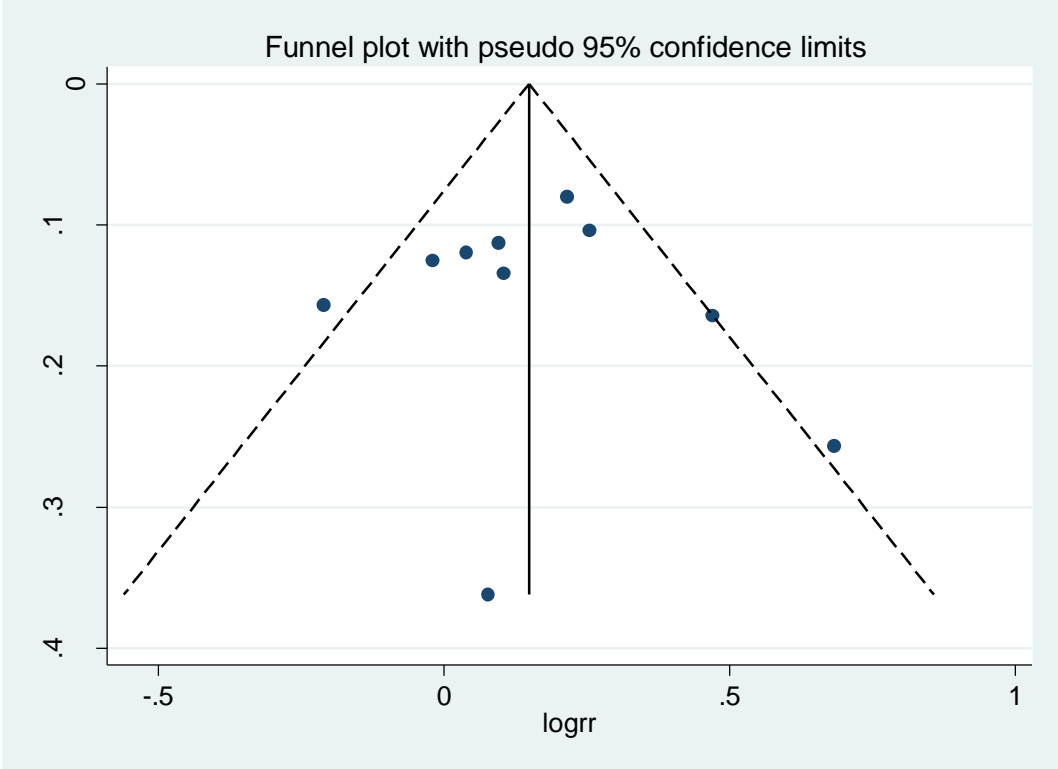

Supplement: MOESM1 [file 15991550]
